# Supplementary material for: Aberrant R-loop-induced replication stress in MED12-mutant uterine fibroids
Source: PubMed Central journal article supplement (PMC9008039; doi:10.1038/s41598-022-10188-x), 2022-04-13
Supplement: 41598_2022_10188_MOESM2_ESM.pdf [file 41598_2022_10188_MOESM2_ESM.pdf]

**Table S1****Table S1: Summary of clinical demographics data for patient samples**

| <b>Sample number</b> | <b>Ethnicity</b> | <b>Age</b> | <b>Solitary/Multiple fibroids</b> | <b>Sample ID</b> | <b>UF M12 Status (WT, MT)</b> |
|----------------------|------------------|------------|-----------------------------------|------------------|-------------------------------|
| 1                    | Caucasian        | 44         | multiple                          | 89               | Fc, Fb                        |
| 2                    | Hispanic         | 47         | multiple                          | 93               | Fa, Fb                        |
| 3                    | Hispanic         | 42         | multiple                          | 104              | Fa, Fb                        |
| 4                    | Hispanic         | 42         | multiple                          | 110              | Fb, Fa                        |
| 5                    | Hispanic         | 48         | multiple                          | 118              | Fa, Fe                        |
| 6                    | Hispanic         | 60         | multiple                          | 121              | Fb, Fa                        |
| 7                    | Hispanic         | 48         | multiple                          | 125              | Fa, Fb                        |
| 8                    | Hispanic         | 44         | multiple                          | 88               | Fa, Fb                        |
| 9                    | Hispanic         | NR         | multiple                          | 99               | Fb, Fc                        |
| 10                   | Hispanic         | 35         | multiple                          | 119              | Fa, Fc                        |
| 11                   | Hispanic         | 49         | multiple                          | 184              | Fa, Fe                        |
| 12                   | Hispanic         | 51         | multiple                          | 187              | Fa, Fc                        |

NR-not recorded.

Patient samples 1-10, including MM and UF MED12 mutation status, have been described previously by us (15). Information related to these patient samples can be accessed in reference (15) by the corresponding sample ID. For Patients 11 and 12, MM and UF MED12 mutation status are shown in Supplemental Figure S3.
